# Supplementary material for: Exploring onset patterns and preventive strategies for early-stage locomotive syndrome through Bayesian network modeling
Source: Research Square preprint supplement (doi:10.21203/rs.3.rs-7909373/v1), 2025-11-06
Supplement: Supplementary file 1 [file 439ca4d684f24cfce1c02953.docx]

**Supplementary File S1**

**Measurements and variables**

### *Demographic information and body composition*

Demographic information and body composition assessments were detailed previously [1]. Data included age, sex, height (cm), weight (kg), visceral fat area (VFA; cm²), skeletal muscle mass (kg), and T-score (%). VFA was measured using a visceral fat meter (EW-FA90; Panasonic Corporation, Osaka, Japan), an authorized medical device in Japan (No. 22500BZX00522000). Collected data were correlated with those obtained using computed tomography, the gold standard for VFA measurement [2].

### *Blood markers and blood pressure*

Blood samples were collected from the antecubital veins of all participants after fasting. Whole blood samples were immediately centrifuged to separate the serum. The levels of serum albumin, interleukin-6, white blood cells, red blood cells, adiponectin, hemoglobin, blood sugar, hemoglobin A1c, total triglycerides, HDL cholesterol (HDLC), aspartate aminotransferase, alanine aminotransferase, procollagen type I N-terminal propeptide, and tartrate-resistant acid phosphatase type 5b were analyzed by LSI Medience Co. (Tokyo, Japan). Systolic blood pressure (SBP) and diastolic blood pressure (DBP) were measured in the seated position using a sphygmomanometer (Omron Healthcare Co., Ltd., Kyoto, Japan).

### *Lifestyle factors*

The Brief-type Self-administered Diet History Questionnaire was used to assess dietary intake [proteins, lipids, carbohydrates, total dietary fiber, sodium, sugar, vitamin K, vitamin D, and serum calcium) over the preceding month. Exercise habits, including sports habits during non-winter seasons (exercise habit: none or ≥1 day/week), time spent on sports (sports time: hours/week), frequency of work (jobFreq: days/week), and working hours (job hours: hours/day), were assessed using a self-administered questionnaire.

Regarding sleep habits, average sleep time over the past month (hours/day) and overall sleep quality (Q7-7_P: 0 = very good, 1 = quite good, 2 = quite bad, 3 = very bad) were assessed using the Pittsburgh Sleep Quality Index. For the other habits, the number of cigarettes (cigarettes/day) and the frequency of dental attendance per year (Q12-2: 0 times, 1 time, 2 times, 3 or more times) were assessed using a self-administered questionnaire.

## **Evaluation of locomotive syndrome (LS)**

LS severity was evaluated using the locomotive syndrome test, including the stand-up test, two-step test, and the 25-question Geriatric Locomotive Function Scale, and locomotive syndrome stages (non- locomotive syndrome, LS1) were determined based on the criteria [3].

## **Evaluation of MetS**

MetS was defined according to Japanese criteria [4], requiring abdominal obesity (waist circumference ≥ 85 cm in men, ≥ 90 cm in women) along with two or more of the following components: (1) high blood pressure (SBP ≥ 130 or DBP ≥ 85 mmHg); (2) high triglyceride levels (≥ 150 mg/dL) and/or reduced HDLC levels (<40 mg/dL); and (3) high fasting glucose levels (≥110 mg/dL).

## **Descriptive analyses**

For the 1,236 participants classified into the non-locomotive syndrome and LS1 groups, the following statistical analyses were performed between groups. Differences in continuous variables between the non-locomotive syndrome and LS1 groups were assessed using the Wilcoxon rank-sum test and are reported as mean ± standard deviation. Differences in proportions among categorical variables (sex, alcohol consumption, exercise habits, sleep quality, and dental attendance) were evaluated using the chi-square test and are reported as percentages. Statistical tests were two-tailed, and a *p*-value of <0.05 was considered statistically significant. All statistical analyses were performed using R v.4.3.0.

**References**

1. Miyazaki, T., *et al.* Association of visceral fat area with early-stage locomotive syndrome across various age groups: A cross-sectional study. *Sci. Rep.* **14**, 25498 (2024). https://doi.org/10.1038/s41598-024-76478-8.

2. Ryo, M., *et al.* A new simple method for the measurement of visceral fat accumulation by bioelectrical impedance. *Diabetes Care* **28**, 451–453 (2005). https://doi.org/10.2337/diacare.28.2.451.

3. Nakamura, K. & Ogata, T. Locomotive syndrome: definition and management. *Clin. Rev. Bone Miner. Metab.* **14**, 56–67 (2016). https://doi.org/10.1007/s12018-016-9208-2.

4. Matsuzawa, Y. Metabolic syndrome—definition and diagnostic criteria in Japan. *J. Atheroscler. Thromb.* **12**, 301 (2005). https://doi.org/10.5551/jat.12.301.
