# Supplementary material for: Exploring onset patterns and preventive strategies for early-stage locomotive syndrome through Bayesian network modeling
Source: Research Square preprint supplement (doi:10.21203/rs.3.rs-7909373/v1), 2025-11-06
Supplement: Supplementary file 2 [file d759d6d863359a2dc0f58f19.docx]

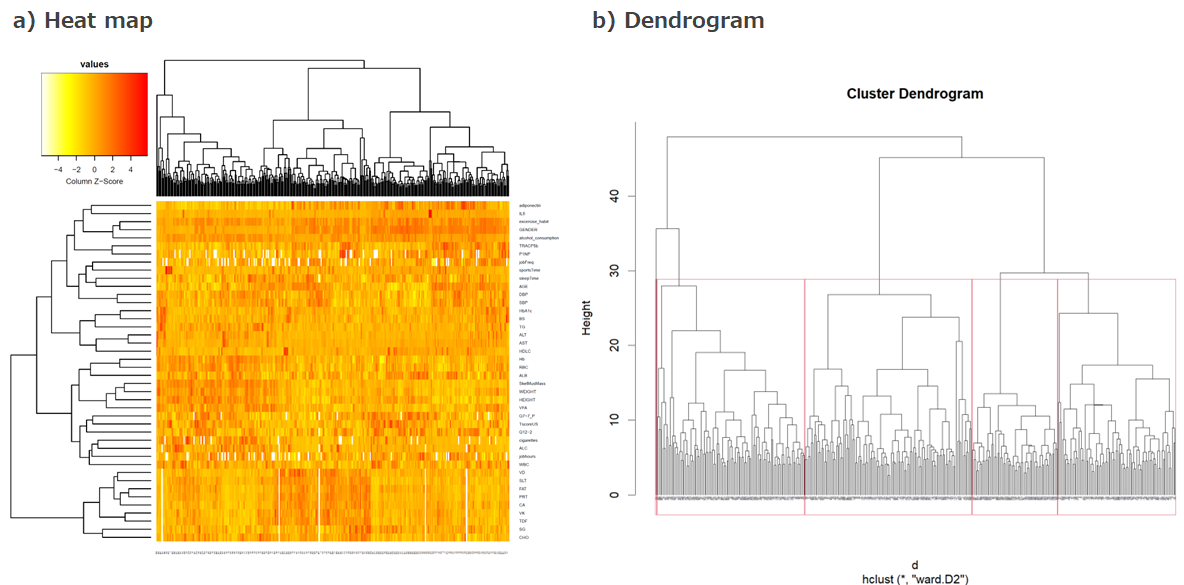


**Supplementary Fig. S2.** Cluster analysis was performed using the hierarchical Ward method for the standardized characteristics of the 352 participants with LS1. (a) Heatmap and clustering results for the matrix of attributes of the 352 samples. (b) Dendrogram showing clustering results with five clusters.
