# Supplementary material for: Exploring onset patterns and preventive strategies for early-stage locomotive syndrome through Bayesian network modeling
Source: Research Square preprint supplement (doi:10.21203/rs.3.rs-7909373/v1), 2025-11-06
Supplement: Supplementary file 3 [file e5d6f7ced7a38c8145a5f56d.docx]

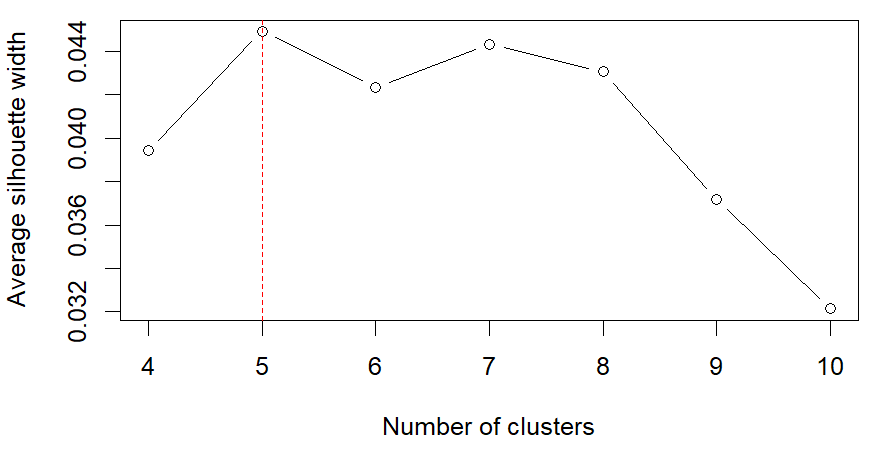


**Supplementary Fig. S1.** Average silhouette width for different numbers of clusters. Average silhouette widths for 4–10 clusters, with the maximum observed at five clusters, indicating the optimal solution.
